# Supplementary material for: Epithelial stratification and placode invagination are separable functions in early morphogenesis of the molar tooth
Source: Oxford University Press journal article supplement (doi:10.1242/dev.130187), 2016-01-01
Supplement: dev130187supp.pdf [file dev130187supp.pdf]

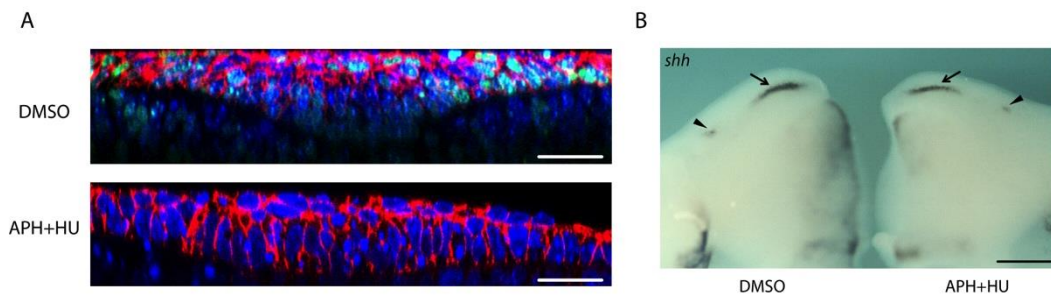

**Figure S1. Inhibition of cell proliferation in mandibular explant culture** (associated with Figure 2). (A) BrdU incorporation in vehicle (DMSO)-treated or proliferation-inhibited (aphidicolin (APH) + hydroxyurea (HU)) mandibles. Blue: DAPI. Green: BrdU. Red:  $\beta$ -catenin. Scale bars: 50  $\mu$ m. (B) Shh in situ hybridisation in vehicle or APH+HU treated mandible cultures. Arrowheads: molars. Arrows: incisors. Scale bar: 500  $\mu$ m.

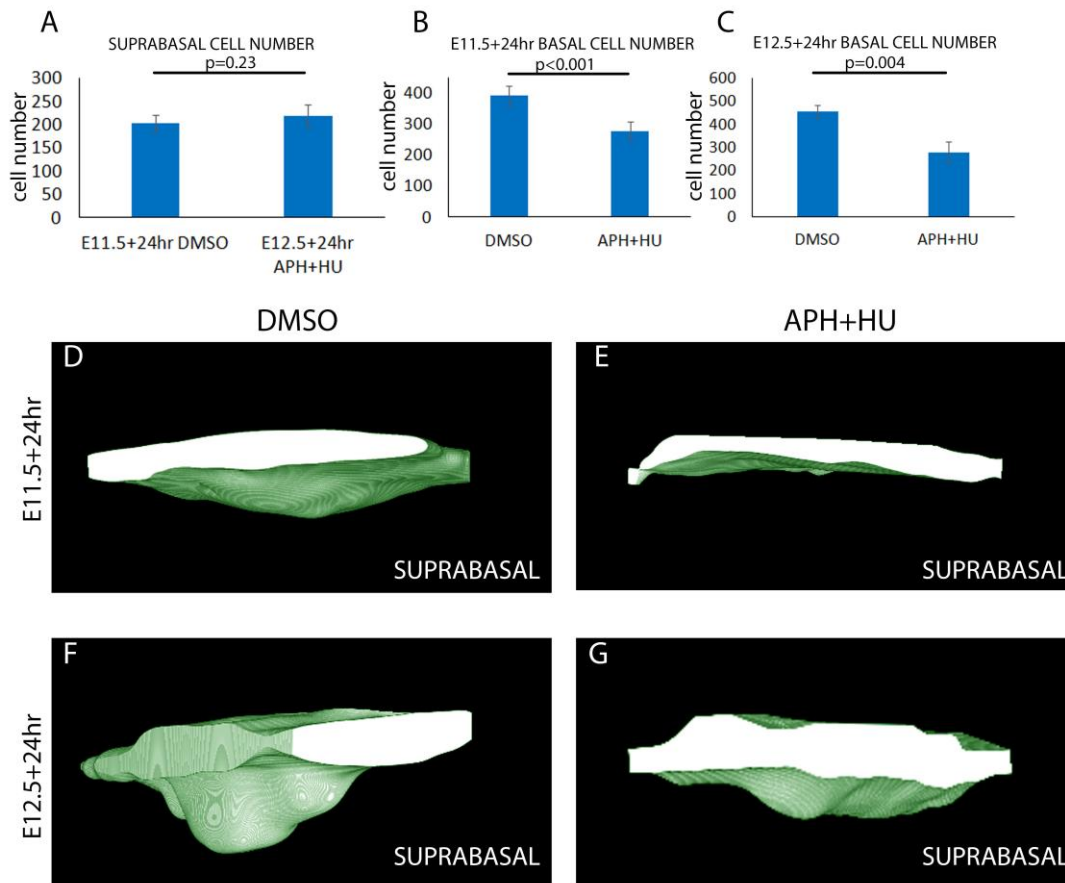

**Figure S2. Basal and suprabasal cell quantification and 3D rendering of suprabasal volume** (associated with Figure 3). (A) Comparison of suprabasal cell numbers between E11.5+24hr control placodes and E12.5+24hr proliferation inhibited placodes. n = 9. (B-C) Quantification of basal cell numbers in E11.5+24hr (B) and E12.5+24hr (C) placodes. n = 9. (D-E) Mandibular molars cultured with vehicle (D) or proliferation inhibitors (E) from E11.5 for 24 hrs. (F-G) Mandibular molars cultured with vehicle (F) or proliferation inhibitors (G) from E12.5 for 24 hrs

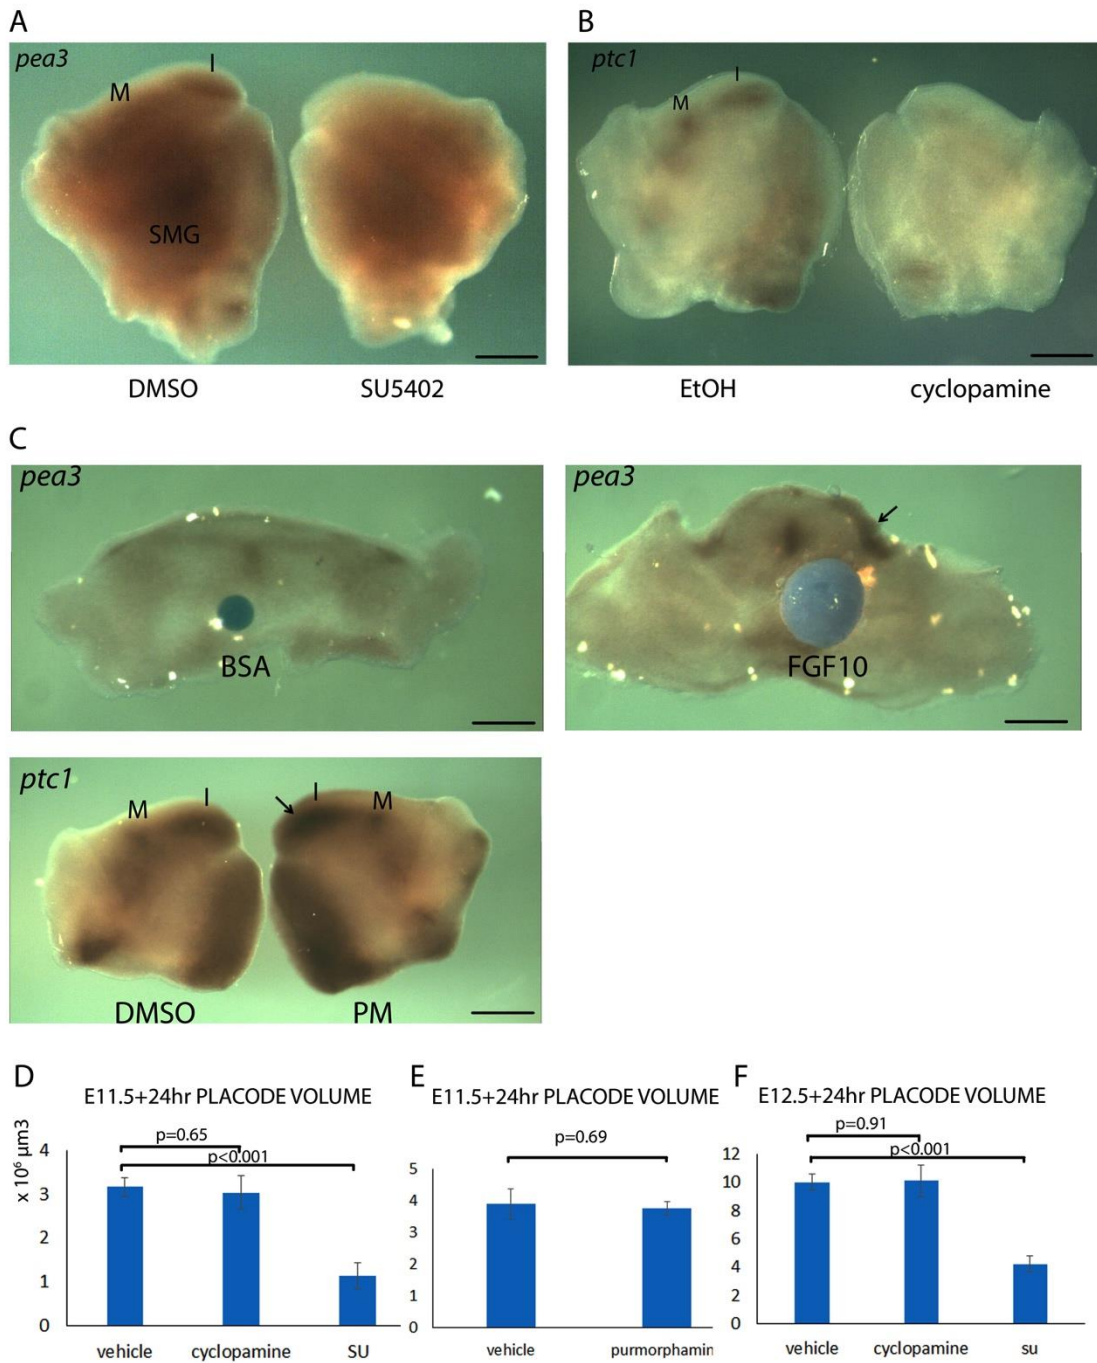

**Figure S3. In situ hybridisation showing gene expression under manipulations of FGF and Shh pathways** (associated with Figures 4 and 5). (A) *pea3* expression in cultured E11.5 mandible was inhibited by FGF inhibitor (SU5402). (B) *ptc1* expression was inhibited by Smoothened inhibitor (cyclopamine). (C) Top panels: *pea3* expression in cultured frontal slices of E11.5 mandible was induced by FGF10 beads. Arrow: induced expression of *pea3* in the tongue epithelium near the bead. Bottom panel: *ptc1* expression was enhanced by purmorphamine treatment in the tooth regions of cultured E11.5 mandibles. Arrow: enhanced *ptc1* expression. M: molar. I: incisor. SMG: submandibular gland. Scale bars: 500 μm. (D-F) Quantification of placode volumes in control, cyclopamine, purmorphamine and SU treated placodes, cultured from E11.5 and E12.5. n = 9.

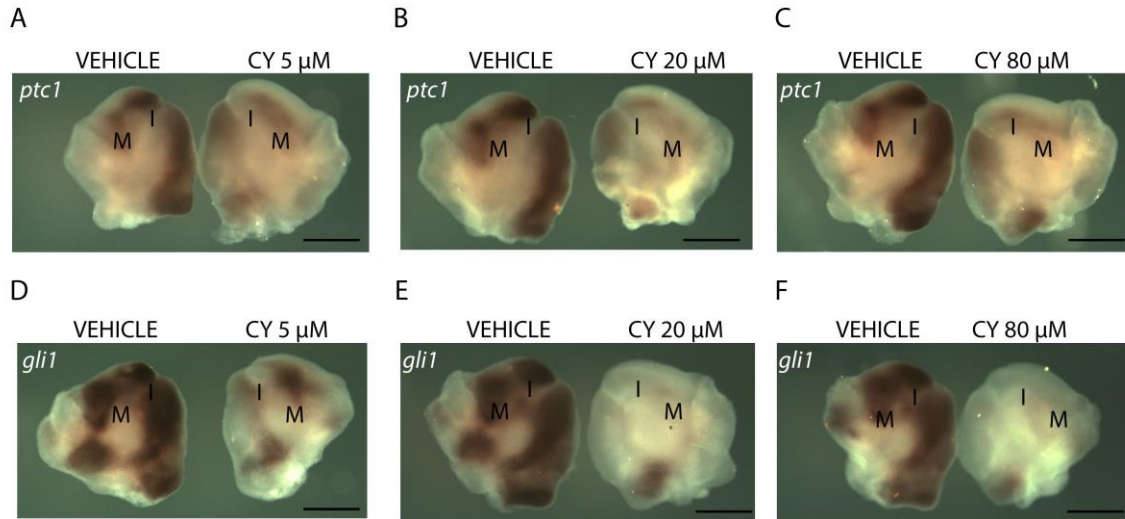

**Figure S4. The efficacy of different concentrations of cyclopamine tested by in situ hybridisation** (associated with Figures 6). (A-C) *ptc1* in situ hybridisation with 5  $\mu$ M (A), 20  $\mu$ M (B) and 80  $\mu$ M (C) cyclopamine or vehicle (EtOH). (D-F) *gli1* in situ hybridisation with 5  $\mu$ M (D), 20  $\mu$ M (E) and 80  $\mu$ M (F) cyclopamine or vehicle (EtOH). I: incisor. M: molar. CY: cyclopamine. Scale bars: 500  $\mu$ m.

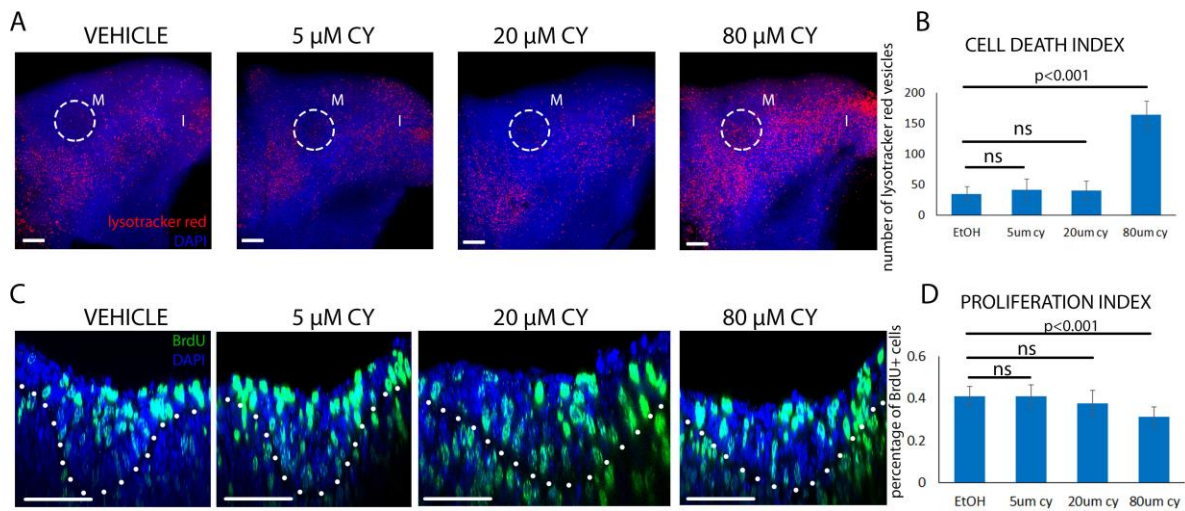

**Figure. S5. Lysotracker red and BrdU labelling under different concentrations of cyclopamine treatments** (associated with Figure 6). (A) Lysotracker red labelling of cultured mandibles. 3D image stacks were taken to determine the invaginated molar regions (circles). Red: Lysotracker red. Blue: DAPI. M: molar. I: incisor. (B) Quantification of Lysotracker red puncta in the molar region (circle).  $n = 9$ . (C) BrdU labelling after different concentrations of cyclopamine treatments. Green: BrdU. Blue: DAPI. Scale Bars: 50  $\mu$ m. White dots: outline of the epithelium. (D) Quantification of the percentage of BrdU positive cells. In the placodes.  $n = 9$ .

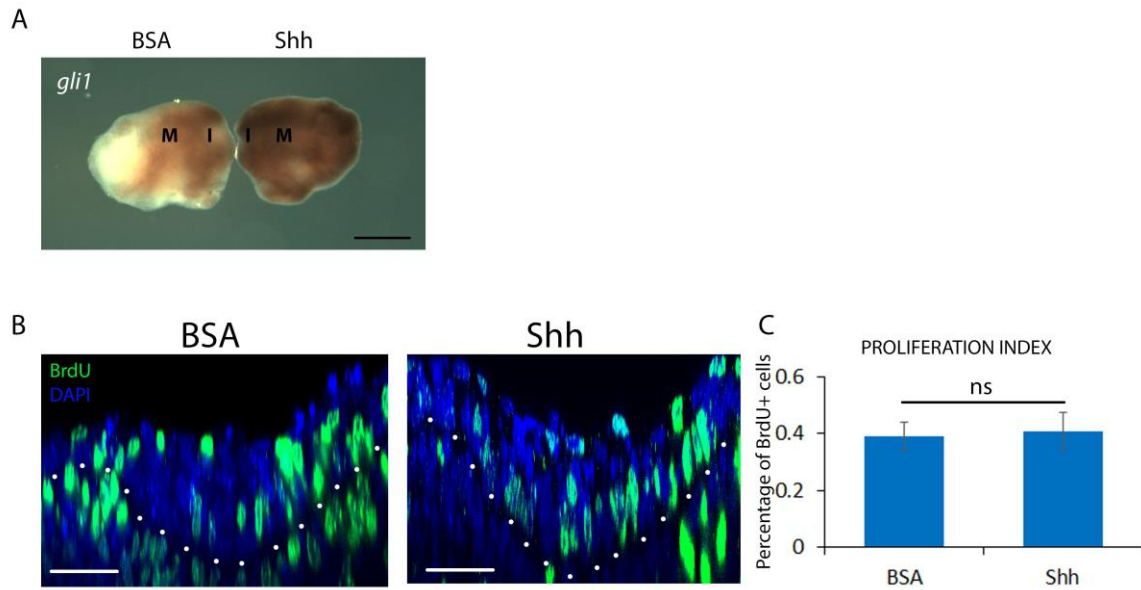

**Figure S6. Shh protein treatment does not affect proliferation** (associated with Figure 6). (A) *gli1* in situ hybridisation showing the efficacy of the Shh protein used in culture. M: molar. I: incisor. Scale bar: 500  $\mu$ m. (B) BrdU labelling in placodes treated with BSA (left) or Shh protein (right). Green: BrdU. Blue: DAPI. White dots: outline of the epithelium. Scale bars: 50  $\mu$ m. (C) Quantification of the percentage of BrdU positive cells in the placode. n = 9.



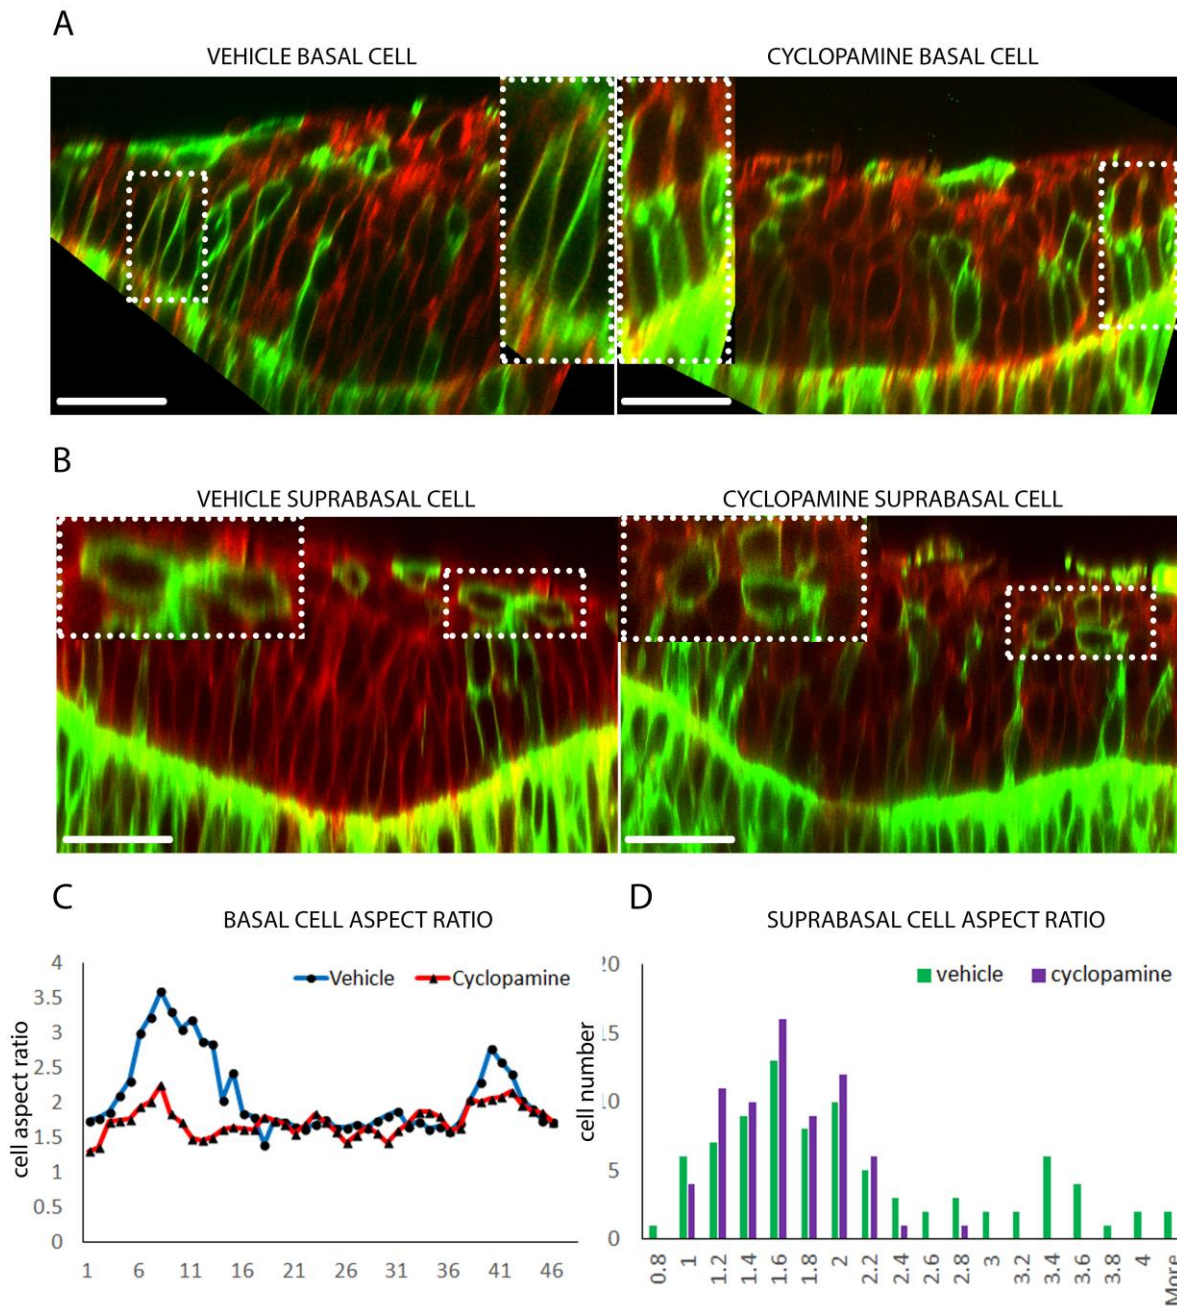

**Figure S7. Cell elongation measurement using mTmG mosaic labelling** (associated with Figure 7). (A) mTmG tooth placode treated with vehicle (EtOH) (left) and cyclopamine (right), showing the elongation of basal cells. Red: mTomato cells. Green: mGFP cells. Dotted rectangles: basal cells on the converging region of the placode. (B) mTmG tooth placode treated with vehicle (EtOH) (left) and cyclopamine (right), showing the elongation of suprabasal cells. Dotted rectangles: suprabasal cells near the surface (but not in the peridermal layer) of the placode. (C) Basal cell aspect ratio across a placode, showing the loss of elongated cells on the two constriction sides under cyclopamine treatment. (D) Suprabasal cell aspect ratio showing the loss of elongated cell population under cyclopamine treatment.  $n = 6$ .
